# Supplementary material for: Continuous synthesis of BaFe2O4 and BaFe12O19 nanoparticles in a droplet microreactor for efficient detection of antihistamine drugs in oral fluid using surface-assisted laser desorption/ionization mass spectrometry
Source: Royal Society of Chemistry journal article supplement (doi:10.1039/d3an01081c), 2023-01-01
Supplement: d3an01081c1.pdf [file d3an01081c1.pdf]

**Continuous synthesis of BaFe<sub>2</sub>O<sub>4</sub> and BaFe<sub>12</sub>O<sub>19</sub> nanoparticles in droplet microreactor for efficient detection of antihistamine drugs in oral fluid using SALDI-MS**

Mohamed O. Amin, Bessy D'Cruz, Entesar Al-Hetlani\*

\* *Chemistry Department, Faculty of Science, Kuwait University, P.O. Box 5969, Safat - 13060,  
Kuwait*

\***Corresponding author:** [entesar.alhetlani@ku.edu.kw](mailto:entesar.alhetlani@ku.edu.kw)

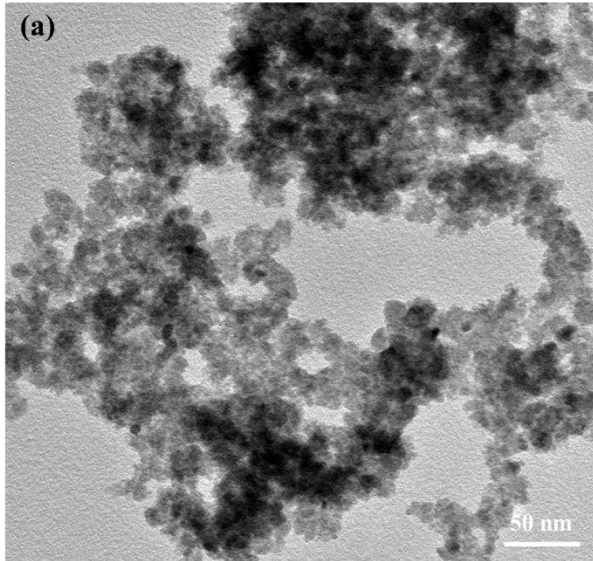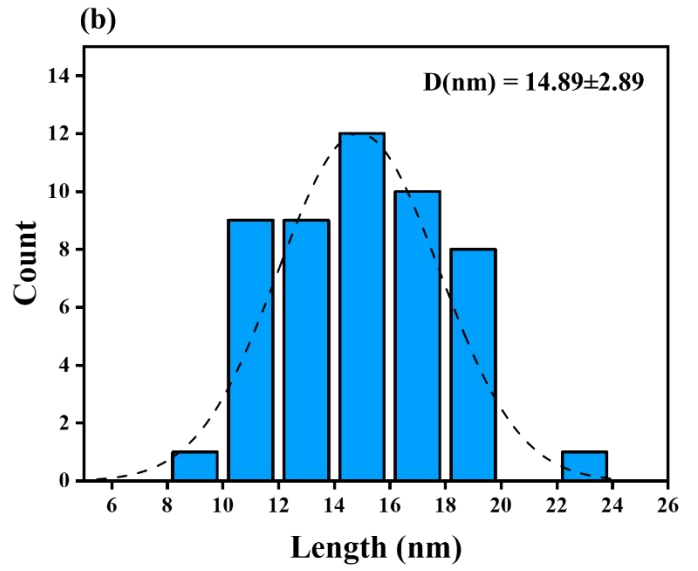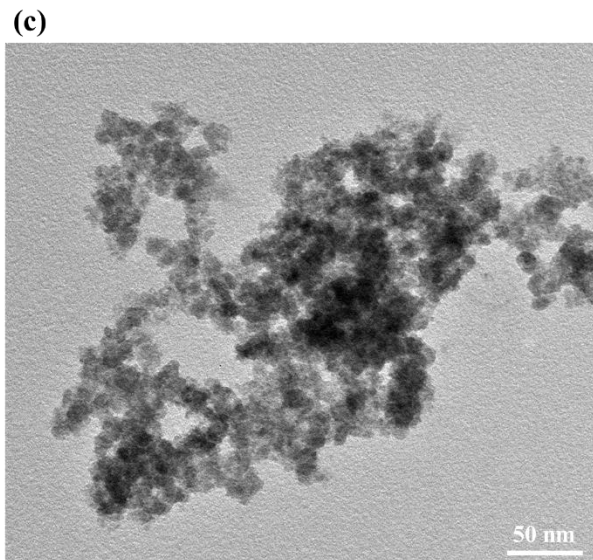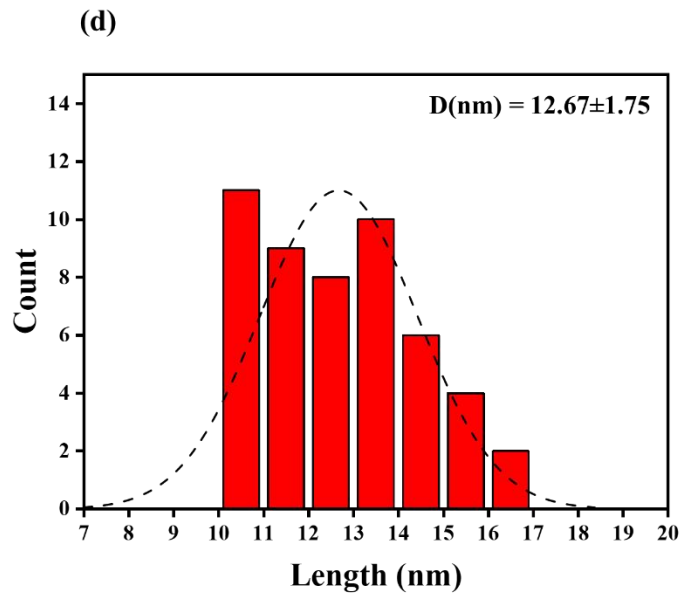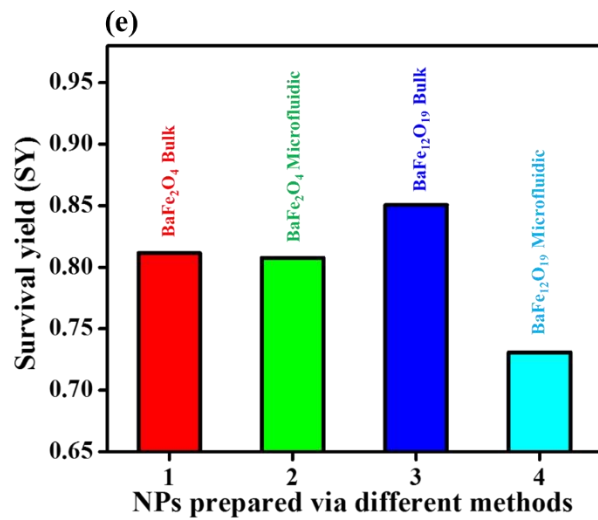

**Figure S1.** Transmission electron microscopy (TEM) image of (a) BaFe<sub>2</sub>O<sub>4</sub>, (c) BaFe<sub>12</sub>O<sub>19</sub> NPs, and (b) and (d) particle size distribution curve for BaFe<sub>2</sub>O<sub>4</sub> and BaFe<sub>12</sub>O<sub>19</sub> NPs synthesized using bulk synthesis. (e) Survival yield (SY) measurements as a function of BaFe<sub>2</sub>O<sub>4</sub> and BaFe<sub>12</sub>O<sub>19</sub> NPs prepared *via* different methods.

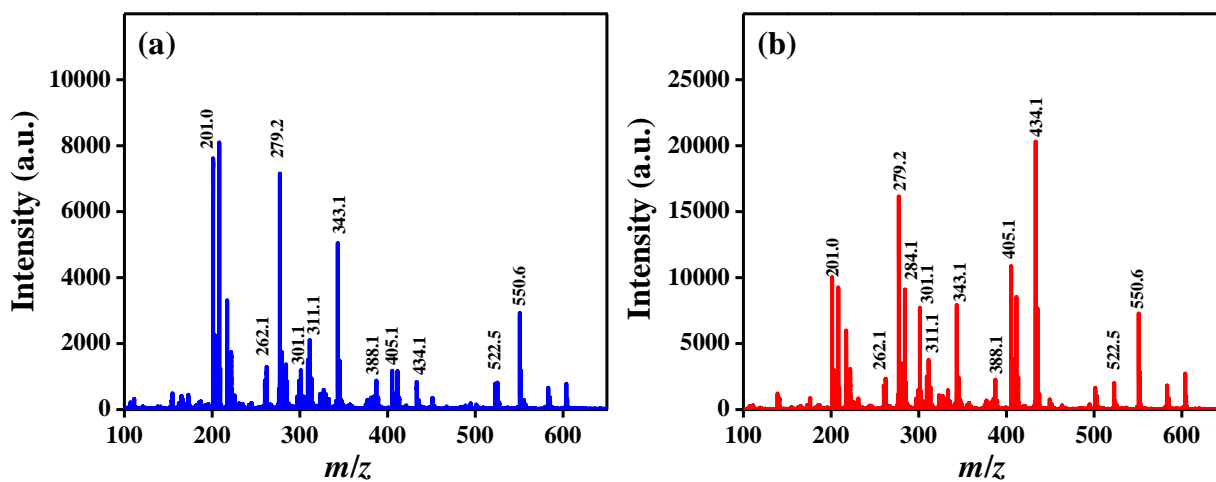

**Figure S2.** SALDI-MS spectra of methapyrilene, triprolidine, desloratadine, loratadine, and cetirizine mixture in solution using (a) BaFe<sub>2</sub>O<sub>4</sub> and (b) BaFe<sub>12</sub>O<sub>19</sub> NPs.

**Table S1:** Compounds identification from the standard mixture of antihistamines solution using BaFe<sub>2</sub>O<sub>4</sub> and BaFe<sub>12</sub>O<sub>19</sub> NPs as SALDI-MS substrates. The LODs of the antihistamine drugs were obtained using standard mixture of the five drugs.

| BaFe <sub>2</sub> O <sub>4</sub> NPs   |                                                                                   |                 |              |                 |                   |       |           |
|----------------------------------------|-----------------------------------------------------------------------------------|-----------------|--------------|-----------------|-------------------|-------|-----------|
| Compound name                          | Possible species                                                                  | Theoretical m/z | Detected m/z | m/z error (ppm) | Average intensity | %RSD  | LOD       |
| Methapyrilene                          | [Meth + H] <sup>+</sup>                                                           | 262.137794      | 262.1386     | -3.08           | 1106.50           | 11.29 | 100 ng/mL |
|                                        | [Meth + Na] <sup>+</sup>                                                          | 284.119738      | 284.1190     | 2.71            | 1289.47           | 13.18 |           |
|                                        | [Meth + 2Na] <sup>+</sup>                                                         | 307.109507      | 307.1099     | -1.34           | 305.87            | 13.16 |           |
| Triprolidine                           | [Trip + H] <sup>+</sup>                                                           | 279.186124      | 279.1875     | -4.87           | 1682.29           | 7.73  | 1 pg/mL   |
|                                        | [Trip + Na] <sup>+</sup>                                                          | 301.168068      | 301.1692     | -3.86           | 1248.66           | 15.75 |           |
| Desloratadine                          | [Desl + H] <sup>+</sup>                                                           | 311.131501      | 311.1324     | -2.79           | 1955.90           | 13.12 | 100 pg/mL |
|                                        | [Desl + Na] <sup>+</sup>                                                          | 333.113446      | 333.1131     | 1.07            | 224.75            | 14.43 |           |
|                                        | [Desl + K] <sup>+</sup>                                                           | 349.087383      | 349.0890     | -4.64           | 4367.78           | 13.60 |           |
| Loratadine                             | [Lora + H] <sup>+</sup>                                                           | 383.152631      | 383.1546     | -5.15           | 319.21            | 14.70 | 10 pg/mL  |
|                                        | [Lora + Na] <sup>+</sup>                                                          | 405.134575      | 405.1361     | -3.69           | 1508.32           | 11.32 |           |
| Cetirizine                             | [Ceti-C <sub>8</sub> H <sub>15</sub> N <sub>2</sub> O <sub>3</sub> ] <sup>+</sup> | 201.04710       | 201.0482     | -5.42           | 7645.36           | 12.22 | 10 ng/mL  |
|                                        | [Ceti-COOH] <sup>+</sup>                                                          | 343.15772       | 343.1562     | 4.42            | 4523.24           | 10.38 |           |
|                                        | [Ceti] <sup>+</sup>                                                               | 388.155370      | 388.1545     | 2.32            | 836.54            | 6.90  |           |
|                                        | [Ceti + H] <sup>+</sup>                                                           | 389.163195      | 389.1644     | -3.07           | 243.78            | 15.14 |           |
|                                        | [Ceti + Na] <sup>+</sup>                                                          | 411.145140      | 411.1440     | 2.88            | 1292.55           | 12.35 |           |
|                                        | [Ceti + 2Na] <sup>+</sup>                                                         | 434.134909      | 434.1364     | -3.53           | 712.49            | 11.14 |           |
| BaFe <sub>12</sub> O <sub>19</sub> NPs |                                                                                   |                 |              |                 |                   |       |           |
| Compound name                          | Possible species                                                                  | Theoretical m/z | Detected m/z | m/z error (ppm) | Average intensity | %RSD  | LOD       |
| Methapyrilene                          | [Meth + H] <sup>+</sup>                                                           | 262.137794      | 262.1379     | -0.27           | 835.53            | 12.38 | 100 ng/mL |
|                                        | [Meth + Na] <sup>+</sup>                                                          | 284.119738      | 284.1186     | 4.12            | 3977.24           | 13.55 |           |
| Triprolidine                           | [Trip + H] <sup>+</sup>                                                           | 279.186124      | 279.1858     | 1.06            | 1392.75           | 8.59  | 1 pg/mL   |
|                                        | [Trip + Na] <sup>+</sup>                                                          | 301.168068      | 301.1679823  | 0.28            | 3496.41           | 17.45 |           |
| Desloratadine                          | [Desl + H] <sup>+</sup>                                                           | 311.131501      | 311.1314     | 0.30            | 1534.54           | 5.85  | 10 pg/mL  |
|                                        | [Desl + Na] <sup>+</sup>                                                          | 333.113446      | 333.1130891  | 1.07            | 621.85            | 17.63 |           |
|                                        | [Desl + K] <sup>+</sup>                                                           | 349.087383      | 349.0857     | 4.88            | 152.69            | 8.75  |           |

|                   |                                                                                       |            |             |       |         |       |          |
|-------------------|---------------------------------------------------------------------------------------|------------|-------------|-------|---------|-------|----------|
| <b>Loratadine</b> | [Lora + H] <sup>+</sup>                                                               | 383.152631 | 383.1546    | -5.23 | 220.60  | 14.80 | 1 pg/mL  |
|                   | [Lora + Na] <sup>+</sup>                                                              | 405.134575 | 405.1361071 | -3.78 | 5253.53 | 16.72 |          |
| <b>Cetirizine</b> | [Ceti-<br>C <sub>8</sub> H <sub>15</sub> N <sub>2</sub> O <sub>3</sub> ] <sup>+</sup> | 201.04710  | 201.047     | 0.62  | 5583.23 | 12.62 | 10 ng/mL |
|                   | [Ceti-COOH]<br>+                                                                      | 343.15772  | 343.1585    | -2.16 | 3721.82 | 13.73 |          |
|                   | [Ceti ] <sup>+</sup>                                                                  | 388.155370 | 388.1561    | -1.93 | 340.94  | 6.46  |          |
|                   | [Ceti + H] <sup>+</sup>                                                               | 389.163195 | 389.1619    | 3.33  | 249.30  | 12.02 |          |
|                   | [Ceti+ Na] <sup>+</sup>                                                               | 411.145140 | 411.1460956 | -2.32 | 3267.7  | 18.31 |          |

**Table S2:** Compounds identification of oral fluid obtained from healthy donor using BaFe<sub>2</sub>O<sub>4</sub> and BaFe<sub>12</sub>O<sub>19</sub> NPs as SALDI-MS substrates.

| <b>BaFe<sub>2</sub>O<sub>4</sub> NPs</b>   |                    |                 |                    |                      |       |
|--------------------------------------------|--------------------|-----------------|--------------------|----------------------|-------|
| Possible species                           | Theoretical<br>m/z | Detected<br>m/z | m/z error<br>(ppm) | Average<br>intensity | %RSD  |
| [Lactic acid +Na] <sup>+</sup>             | 113.021463         | 113.0220        | -4.99              | 8999.83              | 14.66 |
| [Glycine+Ca] <sup>+</sup>                  | 114.994619         | 114.9949        | -2.35              | 4452.72              | 12.01 |
| [Threonine+H] <sup>+</sup>                 | 120.066068         | 120.0660        | 0.95               | 3840.04              | 18.67 |
| [Lactic acid +2Na] <sup>+</sup>            | 136.011233         | 136.0104        | 6.42               | 399.87               | 11.86 |
| [Phenol+Na+Mg] <sup>+</sup>                | 141.016676         | 141.0160        | 4.83               | 318.13               | 13.60 |
| [Phenol+K+Mg] <sup>+</sup>                 | 156.990613         | 156.9911        | -3.37              | 768.06               | 16.77 |
| [Taurine +2Na] <sup>+</sup>                | 170.994203         | 170.9934        | 4.41               | 438.48               | 14.49 |
| [Phenol +K +Ca] <sup>+</sup>               | 172.968162         | 172.9686        | -2.27              | 341.74               | 11.14 |
| [Taurine +Na +K] <sup>+</sup>              | 186.968140         | 186.9683        | -1.04              | 705.69               | 11.06 |
| [Taurine + Ca+ Mg] <sup>+</sup>            | 188.962297         | 188.9635        | -6.21              | 588.13               | 8.54  |
| [Aspartic acid Ca + Mg] <sup>+</sup>       | 196.985140         | 196.9849        | 1.23               | 531.70               | 13.23 |
| <b>BaFe<sub>12</sub>O<sub>19</sub> NPs</b> |                    |                 |                    |                      |       |
| Possible species                           | Theoretical<br>m/z | Detected<br>m/z | m/z error<br>(ppm) | Average<br>intensity | %RSD  |
| [Lactic acid +Na] <sup>+</sup>             | 113.021463         | 113.0222        | -6.17              | 65353.44             | 12.33 |
| [Glycine+Ca] <sup>+</sup>                  | 114.994619         | 114.9951        | -4.56              | 38007.84             | 14.15 |
| [Phenol+Na] <sup>+</sup>                   | 117.031634         | 117.0320        | -3.42              | 3259.16              | 12.69 |
| [Threonine+H] <sup>+</sup>                 | 120.066068         | 120.0657        | 2.77               | 18040.33             | 13.88 |
| [Lactic acid +2Na] <sup>+</sup>            | 136.011233         | 136.0122        | -7.04              | 972.65               | 14.53 |
| [Phenol+Na+Mg] <sup>+</sup>                | 141.016676         | 141.0173        | -4.09              | 1637.94              | 15.66 |
| [Phenol+K+Mg] <sup>+</sup>                 | 156.990613         | 156.9915        | -5.53              | 11670.18             | 14.71 |
| [Threonine + Ca] <sup>+</sup>              | 159.020834         | 159.0200        | 5.23               | 1335.53              | 15.53 |
| [Taurine +2Na] <sup>+</sup>                | 170.994203         | 170.9939        | 1.78               | 3409.37              | 15.85 |

|                                   |            |          |        |         |       |
|-----------------------------------|------------|----------|--------|---------|-------|
| [Phenol +K +Ca] <sup>+</sup>      | 172.968162 | 172.9688 | -3.46  | 2298.37 | 14.29 |
| [Taurine +Na +K] <sup>+</sup>     | 186.968140 | 186.9686 | -3.155 | 7930.33 | 15.97 |
| [Taurine + Ca+ Mg] <sup>+</sup>   | 188.962297 | 188.9616 | 3.79   | 6576.17 | 15.86 |
| [Creatinine + 2K] <sup>+</sup>    | 190.986325 | 190.9866 | -1.32  | 1469.63 | 14.58 |
| [Asparagine + Na+ K] <sup>+</sup> | 194.006968 | 194.0074 | -2.23  | 1274.55 | 15.59 |
| [Aspartic acid Ca + Mg]           | 196.985140 | 196.9840 | 5.91   | 2537.35 | 14.30 |

**Table S3:** Compounds identification obtained from antihistamine drugs standards spiked in oral fluid samples using BaFe<sub>2</sub>O<sub>4</sub> and BaFe<sub>12</sub>O<sub>19</sub> NPs as SALDI-MS substrates

| BaFe <sub>2</sub> O <sub>4</sub> NPs   |                                                                                       |                 |              |                 |                   |       |           |
|----------------------------------------|---------------------------------------------------------------------------------------|-----------------|--------------|-----------------|-------------------|-------|-----------|
| Compound name                          | Possible species                                                                      | Theoretical m/z | Detected m/z | m/z error (ppm) | Average intensity | %RSD  | LOD       |
| Methapyrilene                          | [Meth + Na] <sup>+</sup>                                                              | 284.119738      | 284.1202     | -1.63           | 5569.97           | 8.73  | 900 ng/mL |
|                                        | [Meth + K] <sup>+</sup>                                                               | 300.093675      | 300.0948     | -3.64           | 1231.05           | 10.39 |           |
| Triprolidine                           | [Trip + Na] <sup>+</sup>                                                              | 301.168068      | 301.1691     | -3.49           | 15591.67          | 10.07 | 100 pg/mL |
|                                        | [Trip + K] <sup>+</sup>                                                               | 317.142005      | 317.1404     | 5.19            | 4618.31           | 13.66 |           |
| Desloratadine                          | [Desl + Na] <sup>+</sup>                                                              | 333.113446      | 333.1130     | 1.45            | 9487.55           | 7.83  | 1 ng/mL   |
|                                        | [Desl + K] <sup>+</sup>                                                               | 349.087383      | 349.0891     | -5.01           | 1352.97           | 9.19  |           |
| Loratadine                             | [Lora + Na] <sup>+</sup>                                                              | 405.134575      | 405.1343     | 0.68            | 5144.80           | 11.35 | 100 ng/mL |
|                                        | [Lora + K] <sup>+</sup>                                                               | 421.108512      | 421.1094     | -2.10           | 466.11            | 11.18 |           |
| Cetirizine                             | [Ceti-<br>C <sub>8</sub> H <sub>15</sub> N <sub>2</sub> O <sub>3</sub> ] <sup>+</sup> | 201.047100      | 201.0509     | -4.55           | 4291.05           | 16.48 | 100 ng/mL |
|                                        | [Ceti + Na] <sup>+</sup>                                                              | 411.145140      | 411.1436     | 3.72            | 4297.91           | 17.69 |           |
|                                        | [Ceti + K] <sup>+</sup>                                                               | 427.119077      | 427.1181     | 2.17            | 354.29            | 12.67 |           |
|                                        | [Ceti + 2Na] <sup>+</sup>                                                             | 434.134909      | 434.1362     | -2.98           | 8510.79           | 13.59 |           |
|                                        | [Ceti +Na+<br>K] <sup>+</sup>                                                         | 450.108846      | 450.1080     | 1.95            | 12012.37          | 10.34 |           |
|                                        | [Ceti + 2K] <sup>+</sup>                                                              | 466.082780      | 466.0823     | 1.10            | 3481.31           | 15.27 |           |
| BaFe <sub>12</sub> O <sub>19</sub> NPs |                                                                                       |                 |              |                 |                   |       |           |
| Compound name                          | Possible species                                                                      | Theoretical m/z | Detected m/z | m/z error (ppm) | Average intensity | %RSD  | LOD       |
| Methapyrilene                          | [Meth + Na] <sup>+</sup>                                                              | 284.119738      | 284.1185     | 4.29            | 10940.82          | 10.72 | 900 ng/mL |
|                                        | [Meth + K] <sup>+</sup>                                                               | 300.093675      | 300.0928     | 2.88            | 978.33            | 12.48 |           |
| Triprolidine                           | [Trip + Na] <sup>+</sup>                                                              | 301.168068      | 317.1415     | 1.75            | 27598.42          | 13.72 | 100 pg/mL |
|                                        | [Trip + K] <sup>+</sup>                                                               | 317.142005      | 317.1415     | -4.57           | 9019.15           | 8.65  |           |
| Desloratadine                          | [Desl + Na] <sup>+</sup>                                                              | 333.113446      | 333.1125     | 2.87            | 10518.29          | 15.89 | 100 ng/mL |

|                   |                                                                                       |            |          |       |         |       |           |
|-------------------|---------------------------------------------------------------------------------------|------------|----------|-------|---------|-------|-----------|
|                   | [Desl + K] <sup>+</sup>                                                               | 349.087383 | 349.0878 | -1.22 | 1347.57 | 11.65 |           |
| <b>Loratadine</b> | [Lora + Na] <sup>+</sup>                                                              | 405.134575 | 405.1327 | 4.70  | 4022.83 | 15.21 | 100 ng/mL |
|                   | [Lora + K] <sup>+</sup>                                                               | 421.108512 | 421.1090 | -1.23 | 385.66  | 13.64 |           |
| <b>Cetirizine</b> | [Ceti-<br>C <sub>8</sub> H <sub>15</sub> N <sub>2</sub> O <sub>3</sub> ] <sup>+</sup> | 201.047100 | 201.0473 | -1.16 | 1626.76 | 13.30 | 100 ng/mL |
|                   | [Ceti + Na] <sup>+</sup>                                                              | 411.145140 | 411.1466 | -3.58 | 2998.24 | 13.70 |           |
|                   | [Ceti + K] <sup>+</sup>                                                               | 427.119077 | 427.1215 | -5.63 | 585.86  | 8.85  |           |
|                   | [Ceti + 2Na] <sup>+</sup>                                                             | 434.134909 | 434.1348 | 0.20  | 6526.57 | 15.04 |           |
|                   | [Ceti +Na+<br>K] <sup>+</sup>                                                         | 450.108846 | 450.1074 | 3.20  | 8742.96 | 10.98 |           |
|                   | [Ceti + 2K] <sup>+</sup>                                                              | 466.082780 | 466.0831 | -0.75 | 3511.83 | 14.92 |           |

**Table S4:** Compounds identification from the levocetirizine tablet (1mg mL<sup>-1</sup>) in solution using BaFe<sub>2</sub>O<sub>4</sub> and BaFe<sub>12</sub>O<sub>19</sub> NPs as SALDI-MS substrates.

| <b>BaFe<sub>2</sub>O<sub>4</sub> NPs</b>                                          |                 |              |                 |                   |       |
|-----------------------------------------------------------------------------------|-----------------|--------------|-----------------|-------------------|-------|
| Possible species                                                                  | Theoretical m/z | Detected m/z | m/z error (ppm) | Average intensity | %RSD  |
| [Ceti-C <sub>8</sub> H <sub>15</sub> N <sub>2</sub> O <sub>3</sub> ] <sup>+</sup> | 201.047100      | 201.0479     | -4.03           | 24645.89          | 16.35 |
| [Ceti-COOH] <sup>+</sup>                                                          | 343.157720      | 343.1563     | 4.23            | 3402.41           | 10.99 |
| [Ceti] <sup>+</sup>                                                               | 388.155370      | 388.1555     | -0.31           | 1166.50           | 15.77 |
| [Ceti + Na] <sup>+</sup>                                                          | 411.145140      | 411.1423     | 6.95            | 6405.80           | 10.37 |
| [Ceti - H + 2Na] <sup>+</sup>                                                     | 433.127084      | 433.1279     | -1.89           | 6081.44           | 11.37 |
| <b>BaFe<sub>12</sub>O<sub>19</sub> NPs</b>                                        |                 |              |                 |                   |       |
| Possible species                                                                  | Theoretical m/z | Detected m/z | m/z error (ppm) | Average intensity | %RSD  |
| [Ceti-C <sub>8</sub> H <sub>15</sub> N <sub>2</sub> O <sub>3</sub> ] <sup>+</sup> | 201.047100      | 201.0461     | 4.83            | 14132.25          | 17.40 |
| [Ceti-COOH] <sup>+</sup>                                                          | 343.157720      | 343.1561     | 4.64            | 3259.07           | 15.53 |
| [Ceti] <sup>+</sup>                                                               | 388.155370      | 388.1548     | 1.46            | 1524.12           | 9.86  |
| [Ceti + Na] <sup>+</sup>                                                          | 411.145140      | 411.1436     | 3.79            | 8776.81           | 16.01 |
| [Ceti - H + 2Na] <sup>+</sup>                                                     | 433.127084      | 433.1279     | -1.88           | 9086.02           | 10.90 |

**Table S5:** Compounds identification from 500  $\mu\text{g mL}^{-1}$  levocetirizine tablet spiked oral fluid using  $\text{BaFe}_2\text{O}_4$  and  $\text{BaFe}_{12}\text{O}_{19}$  NPs as SALDI-MS substrates.

| <b>BaFe<sub>2</sub>O<sub>4</sub> NPs</b>                                          |                 |              |                 |                   |       |           |
|-----------------------------------------------------------------------------------|-----------------|--------------|-----------------|-------------------|-------|-----------|
| Possible species                                                                  | Theoretical m/z | Detected m/z | m/z error (ppm) | Average intensity | %RSD  | LOD       |
| [Lactic acid +Na] <sup>+</sup>                                                    | 113.021463      | 113.0220     | -4.62           | 24212.07          | 16.40 | 250 ng/mL |
| [Glycine+Ca] <sup>+</sup>                                                         | 114.994619      | 114.9951     | -4.56           | 15239.87          | 17.22 |           |
| [Threonine+H] <sup>+</sup>                                                        | 120.066068      | 120.0657     | 3.01            | 7212.82           | 13.85 |           |
| [Lactic acid +2Na] <sup>+</sup>                                                   | 136.011233      | 136.0118     | -4.33           | 497.50            | 15.58 |           |
| [Phenol+Na+Mg] <sup>+</sup>                                                       | 141.016676      | 141.0173     | -4.09           | 3543.80           | 9.96  |           |
| [Phenol+K+Mg] <sup>+</sup>                                                        | 156.990613      | 156.9913     | -4.38           | 7274.75           | 11.73 |           |
| [taurine +2Na] <sup>+</sup>                                                       | 170.994203      | 170.9938     | 2.36            | 2143.41           | 12.89 |           |
| [Phenol +K +Ca] <sup>+</sup>                                                      | 172.968162      | 172.9692     | -5.61           | 1659.94           | 11.96 |           |
| [taurine +Na +K] <sup>+</sup>                                                     | 186.968140      | 186.9683     | -1.04           | 4169.31           | 15.62 |           |
| [taurine + Ca+ Mg] <sup>+</sup>                                                   | 188.962297      | 188.9633     | -5.56           | 3440.21           | 12.46 |           |
| [Aspartic acid Ca + Mg] <sup>+</sup>                                              | 196.985140      | 196.9843     | 4.21            | 1623.48           | 15.51 |           |
| [Ceti-C <sub>8</sub> H <sub>15</sub> N <sub>2</sub> O <sub>3</sub> ] <sup>+</sup> | 201.04710       | 201.0485     | -7.15           | 2522.04           | 5.89  |           |
| [Ceti + Na] <sup>+</sup>                                                          | 411.145140      | 411.1436     | 3.85            | 1565.26           | 9.04  |           |
| [Ceti - H + 2Na] <sup>+</sup>                                                     | 433.127084      | 433.1280     | -2.19           | 3237.75           | 4.73  |           |
| <b>BaFe<sub>12</sub>O<sub>19</sub> NPs</b>                                        |                 |              |                 |                   |       |           |
| Possible species                                                                  | Theoretical m/z | Detected m/z | m/z error (ppm) | Average intensity | %RSD  | LOD       |
| [Lactic acid +Na] <sup>+</sup>                                                    | 113.021463      | 113.0221     | -5.51           | 85587.91          | 15.35 | 250 ng/mL |
| [Glycine+Ca] <sup>+</sup>                                                         | 114.994619      | 114.9951     | -4.56           | 66040.51          | 11.42 |           |
| [Phenol+Na] <sup>+</sup>                                                          | 117.031634      | 117.0322     | -5.22           | 1176.74           | 18.26 |           |
| [Threonine+H] <sup>+</sup>                                                        | 120.066068      | 120.0669     | -6.89           | 13835.88          | 18.26 |           |
| [Lactic acid +2Na] <sup>+</sup>                                                   | 136.011233      | 136.0107     | 3.95            | 401.52            | 13.27 |           |
| [Phenol+Na+Mg] <sup>+</sup>                                                       | 141.016676      | 141.0174     | -5.09           | 5215.67           | 14.73 |           |
| [Phenol+K+Mg] <sup>+</sup>                                                        | 156.990613      | 156.9914     | -4.90           | 24416.89          | 13.07 |           |
| [Threonine + Ca] <sup>+</sup>                                                     | 159.020834      | 159.0218     | -6.27           | 2738.86           | 15.86 |           |
| [Taurine +2Na] <sup>+</sup>                                                       | 170.994203      | 170.9938     | 2.55            | 10179.73          | 19.42 |           |
| [Phenol +K +Ca] <sup>+</sup>                                                      | 172.968162      | 172.9688     | -3.46           | 7815.15           | 17.10 |           |



|                                                                                   |            |          |       |          |       |
|-----------------------------------------------------------------------------------|------------|----------|-------|----------|-------|
| [Taurine +Na +K] <sup>+</sup>                                                     | 186.968140 | 186.9669 | 6.64  | 21297.47 | 16.71 |
| [Taurine + Ca+ Mg] <sup>+</sup>                                                   | 188.962297 | 188.9634 | -5.90 | 17544.38 | 18.12 |
| [Creatinine + 2K] <sup>+</sup>                                                    | 190.986325 | 190.9876 | -6.56 | 4295.26  | 12.70 |
| [Asparagine + Na+ K] <sup>+</sup>                                                 | 194.006968 | 194.0074 | -2.26 | 1343.47  | 13.83 |
| [Aspartic acid Ca + Mg] <sup>+</sup>                                              | 196.985140 | 196.9860 | -4.50 | 4240.59  | 16.57 |
| [Ceti-C <sub>8</sub> H <sub>15</sub> N <sub>2</sub> O <sub>3</sub> ] <sup>+</sup> | 201.047100 | 201.0462 | 4.44  | 3030.85  | 4.97  |
| [Ceti + Na] <sup>+</sup>                                                          | 411.145140 | 411.1442 | 2.34  | 3576.36  | 12.63 |
| [Ceti - H + 2Na] <sup>+</sup>                                                     | 433.127084 | 433.1273 | -0.55 | 3735.06  | 11.31 |
| [Ceti-H+Na] <sup>+</sup>                                                          | 449.101021 | 449.1039 | -6.51 | 6884.07  | 16.05 |
